# Supplementary material for: Germline multigene panel testing of patients with endometrial cancer
Source: PubMed Central journal article supplement (PMC10157349; doi:10.3892/ol.2023.13802), 2023-04-12
Supplement: Supplementary_Data.pdf [file Supplementary_Data.pdf]

Table SI. List of all 10 patient sample contributors participating in the study.

| Patient sample contributors                                                                                                                                                   | Number of patients included in the study |
|-------------------------------------------------------------------------------------------------------------------------------------------------------------------------------|------------------------------------------|
| The Bank of Clinical Samples, First Faculty of Medicine, Charles University, Prague, Czech Republic                                                                           | 235                                      |
| Institute of Medical Biochemistry and Laboratory Diagnostics, First Faculty of Medicine, Charles University and General University Hospital in Prague, Prague, Czech Republic | 51                                       |
| Department of Cancer Epidemiology and Genetics, Masaryk Memorial Cancer Institute, Brno, Czech Republic                                                                       | 29                                       |
| Department of Medical Genetics, AGEL Laboratories, AGEL Research and Training Institute, Novy Jicin, Czech Republic                                                           | 15                                       |
| Centre for Medical Genetics and Reproductive Medicine, Gennet, Prague, Czech Republic                                                                                         | 140                                      |
| Institute of Biology and Medical Genetics, First Faculty of Medicine and General University Hospital in Prague, Prague, Czech Republic                                        | 25                                       |
| Department of Medical Genetics, GHC Genetics, Prague, Czech Republic                                                                                                          | 4                                        |
| Department of Medical Genetics, Faculty of Medicine in Pilsen, Charles University, and University Hospital Pilsen, Pilsen, Czech Republic                                     | 10                                       |
| Department of Medical Genetics, Pronatal, Prague, Czech Republic                                                                                                              | 2                                        |
| Department of Medical Genetics, University Hospital Olomouc, Faculty of Medicine and Dentistry, Palacky University Olomouc, Czech Republic                                    | 16                                       |

Table SII. List of all 226 genes included in the CZECA panel with used transcript variants and full names.

| A, Established EC-predisposition genes (N=19) |                    |                                                   |
|-----------------------------------------------|--------------------|---------------------------------------------------|
| Gene name                                     | Transcript variant | Gene name (alternative denominations)             |
| <i>ATM</i>                                    | NM_000051.3        | Ataxia telangiectasia mutated                     |
| <i>BARD1</i>                                  | NM_000465.3        | BRCA1 associated RING domain 1                    |
| <i>BRCA1</i>                                  | NM_007294.3        | Breast cancer 1, early onset                      |
| <i>BRCA2</i>                                  | NM_000059.3        | Breast cancer 2, early onset                      |
| <i>BRIP1</i>                                  | NM_032043.2        | BRCA1 interacting protein C-terminal helicase 1   |
| <i>CDH1</i>                                   | NM_004360.4        | Cadherin 1, type 1, E-cadherin                    |
| <i>EPCAM</i> <sup>a</sup>                     | NM_002354.2        | Epithelial cell adhesion molecule                 |
| <i>CHEK2</i>                                  | NM_007194.3        | Checkpoint kinase 2                               |
| <i>MLH1</i>                                   | NM_000249.3        | mutL homolog 1, colon cancer, nonpolyposis type 2 |
| <i>MSH2</i>                                   | NM_000251.2        | mutS homolog 2, colon cancer, nonpolyposis type 1 |
| <i>MSH6</i>                                   | NM_000179.2        | mutS homolog 6                                    |
| <i>NF1</i>                                    | NM_000267.3        | Neurofibromin 1                                   |
| <i>PALB2</i>                                  | NM_024675.3        | Partner and localizer of BRCA2                    |
| <i>PMS2</i>                                   | NM_000535.6        | PMS1 homolog 2                                    |
| <i>PTEN</i>                                   | NM_000314.6        | Phosphatase and tensin homolog                    |
| <i>RAD51C</i>                                 | NM_058216.2        | RAD51 homolog C                                   |
| <i>RAD51D</i>                                 | NM_002878.3        | RAD51 homolog D                                   |
| <i>STK11</i>                                  | NM_000455.4        | Serine/threonine kinase 11                        |
| <i>TP53</i>                                   | NM_000546.5        | Tumor protein p53                                 |
| B, Candidate genes (N=207)                    |                    |                                                   |
| Gene name                                     | Transcript variant | Gene name (alternative denominations)             |

|               |                |                                                                           |
|---------------|----------------|---------------------------------------------------------------------------|
| <i>AIP</i>    | NM_003977.3    | Aryl hydrocarbon receptor interacting protein                             |
| <i>ALK</i>    | NM_004304.4    | Anaplastic lymphoma kinase                                                |
| <i>APC</i>    | NM_000038.5    | Adenomatous polyposis coli                                                |
| <i>APEX1</i>  | NM_001641.3    | APEX nuclease (multifunctional DNA repair enzyme) 1                       |
| <i>ATMIN</i>  | NM_015251.2    | ATM interactor                                                            |
| <i>ATR</i>    | NM_001184.3    | Ataxia telangiectasia and Rad3 related                                    |
| <i>ATRIP</i>  | NM_130384.2    | ATR interacting protein                                                   |
| <i>AURKA</i>  | NM_198433.2    | Aurora kinase A                                                           |
| <i>AXIN1</i>  | NM_003502.3    | Axin 1                                                                    |
| <i>BABAM1</i> | NM_001033549.2 | BRISC and BRCA1 A complex member 1                                        |
| <i>BAP1</i>   | NM_004656.3    | BRCA1 associated protein-1 (ubiquitin carboxy-terminal hydrolase)         |
| <i>BLM</i>    | NM_000057.3    | Bloom syndrome, RecQ helicase-like                                        |
| <i>BMPRIA</i> | NM_004329.2    | Bone morphogenetic protein receptor, type IA                              |
| <i>BRAP</i>   | NM_006768.4    | BRCA1 associated protein                                                  |
| <i>BRCC3</i>  | NM_024332.3    | BRCA1/BRCA2-containing complex, subunit 3                                 |
| <i>BRE</i>    | NM_004899.4    | Brain and reproductive organ-expressed (TNFRSF1A modulator)               |
| <i>BUB1B</i>  | NM_001211.5    | Budding uninhibited by benzimidazoles 1 homolog beta                      |
| <i>CASP8</i>  | NM_001080125.1 | Caspase 8, apoptosis-related cysteine peptidase                           |
| <i>CCND1</i>  | NM_053056.2    | Cyclin D1                                                                 |
| <i>CDC73</i>  | NM_024529.4    | Cell division cycle 73, Paf1/RNA polymerase II complex component, homolog |

|                |                |                                                                                   |
|----------------|----------------|-----------------------------------------------------------------------------------|
| <i>CDK4</i>    | NM_000075.3    | Cyclin-dependent kinase 4                                                         |
| <i>CDKN1B</i>  | NM_004064.4    | Cyclin-dependent kinase inhibitor 1B (p27, Kip1)                                  |
| <i>CDKN1C</i>  | NM_000076.2    | Cyclin-dependent kinase inhibitor 1C (p57, Kip2)                                  |
| <i>CDKN2A</i>  | NM_000077.4    | Cyclin-dependent kinase inhibitor 2A                                              |
| <i>CEBPA</i>   | NM_004364.4    | CCAAT/enhancer binding protein (C/EBP), alpha                                     |
| <i>CEP57</i>   | NM_014679.4    | Centrosomal protein 57kDa                                                         |
| <i>CLSPN</i>   | NM_022111.3    | Claspin                                                                           |
| <i>CSNK1D</i>  | NM_001893.4    | Casein kinase 1, delta                                                            |
| <i>CSNK1E</i>  | NM_001894.4    | Casein kinase 1, epsilon                                                          |
| <i>CWF19L2</i> | NM_152434.2    | CWF19-like 2, cell cycle control                                                  |
| <i>CYLD</i>    | NM_015247.2    | Cylindromatosis (turban tumor syndrome)                                           |
| <i>DCLRE1C</i> | NM_001033855.2 | DNA cross-link repair 1C                                                          |
| <i>DDB2</i>    | NM_000107.2    | Damage-specific DNA binding protein 2, 48kDa                                      |
| <i>DHFR</i>    | NM_000791.3    | Dihydrofolate reductase                                                           |
| <i>DICER1</i>  | NM_030621.4    | Dicer 1, ribonuclease type III                                                    |
| <i>DIS3L2</i>  | NM_152383.4    | DIS3 like 3'-5' exoribonuclease 2                                                 |
| <i>DMBT1</i>   | NM_007329.2    | Deleted in malignant brain tumors 1                                               |
| <i>DMC1</i>    | NM_007068.3    | DMC1 dosage suppressor of mck1 homolog, meiosis-specific homologous recombination |
| <i>DNAJC21</i> | NM_194283.3    | DnaJ (Hsp40) homolog, subfamily C, member 21                                      |
| <i>DPYD</i>    | NM_000110.3    | Dihydropyrimidine dehydrogenase                                                   |
| <i>EGFR</i>    | NM_005228.3    | Epidermal growth factor receptor                                                  |
| <i>EMSY</i>    | NM_001300942.1 | EMSY transcriptional repressor, BRCA2 interacting                                 |
| <i>EPHX1</i>   | NM_000120.3    | Epoxide hydrolase 1                                                               |

|                |             |                                                                                       |
|----------------|-------------|---------------------------------------------------------------------------------------|
| <i>ERCC1</i>   | NM_001983.3 | Excision repair cross-complementing rodent repair deficiency, complementation group 1 |
| <i>ERCC2</i>   | NM_000400.3 | Excision repair cross-complementing rodent repair deficiency, complementation group 2 |
| <i>ERCC3</i>   | NM_000122.1 | Excision repair cross-complementing rodent repair deficiency, complementation group 3 |
| <i>ERCC4</i>   | NM_005236.2 | Excision repair cross-complementing rodent repair deficiency, complementation group 4 |
| <i>ERCC5</i>   | NM_000123.3 | Excision repair cross-complementing rodent repair deficiency, complementation group 5 |
| <i>ERCC6</i>   | NM_000124.3 | Excision repair cross-complementing rodent repair deficiency, complementation group 6 |
| <i>ESR1</i>    | NM_000125.3 | Estrogen receptor 1                                                                   |
| <i>ESR2</i>    | NM_001437.2 | Estrogen receptor 2 (ER beta)                                                         |
| <i>EXO1</i>    | NM_006027.4 | Exonuclease 1                                                                         |
| <i>EXT1</i>    | NM_000127.2 | Exostosin 1                                                                           |
| <i>EXT2</i>    | NM_000401.3 | Exostosin 2                                                                           |
| <i>EYA2</i>    | NM_005244.4 | Eyes absent homolog 2                                                                 |
| <i>EZH2</i>    | NM_004456.4 | Enhancer of zeste homolog 2                                                           |
| <i>FAAP24</i>  | NM_152266.4 | FA core complex associated protein 24                                                 |
| <i>FAM175A</i> | NM_139076.2 | Family with sequence similarity 175, member A                                         |
| <i>FAM175B</i> | NM_032182.3 | Family with sequence similarity 175, member B                                         |
| <i>FAN1</i>    | NM_014967.4 | FANCD2/FANCI-associated nuclease 1                                                    |

|                |                |                                                                      |
|----------------|----------------|----------------------------------------------------------------------|
| <i>FANCA</i>   | NM_000135.2    | Fanconi anemia, complementation group A                              |
| <i>FANCB</i>   | NM_001018113.2 | Fanconi anemia, complementation group B                              |
| <i>FANCC</i>   | NM_000136.2    | Fanconi anemia, complementation group C                              |
| <i>FANCD2</i>  | NM_033084.4    | Fanconi anemia, complementation group D2                             |
| <i>FANCE</i>   | NM_021922.2    | Fanconi anemia, complementation group E                              |
| <i>FANCF</i>   | NM_022725.3    | Fanconi anemia, complementation group F                              |
| <i>FANCG</i>   | NM_004629.1    | Fanconi anemia, complementation group G                              |
| <i>FANCI</i>   | NM_001113378.1 | Fanconi anemia, complementation group I                              |
| <i>FANCL</i>   | NM_001114636.1 | Fanconi anemia, complementation group L                              |
| <i>FANCM</i>   | NM_020937.3    | Fanconi anemia, complementation group M                              |
| <i>FBXW7</i>   | NM_033632.3    | F-box and WD repeat domain containing 7, E3 ubiquitin protein ligase |
| <i>FH</i>      | NM_000143.3    | Fumarate hydratase                                                   |
| <i>FLCN</i>    | NM_144997.5    | Folliculin                                                           |
| <i>GADD45A</i> | NM_001924.3    | Growth arrest and DNA-damage-inducible, alpha                        |
| <i>GATA2</i>   | NM_001145661.1 | GATA binding protein 2                                               |
| <i>GPC3</i>    | NM_004484.3    | Glypican 3                                                           |
| <i>GRB7</i>    | NM_001242442.1 | Growth factor receptor-bound protein 7                               |
| <i>HELQ</i>    | NM_133636.3    | Helicase, POLQ-like                                                  |
| <i>HNF1A</i>   | NM_001306179.1 | HNF1 homeobox A                                                      |

|               |                |                                                               |
|---------------|----------------|---------------------------------------------------------------|
| <i>HOXB13</i> | NM_006361.5    | Homeobox B13                                                  |
| <i>HRAS</i>   | NM_005343.3    | v-Ha-ras Harvey rat sarcoma viral oncogene homolog            |
| <i>HUS1</i>   | NM_004507.3    | HUS1 checkpoint homolog                                       |
| <i>CHEK1</i>  | NM_001114122.2 | Checkpoint kinase 1                                           |
| <i>KAT5</i>   | NM_182710.2    | K(lysine) acetyltransferase 5                                 |
| <i>KCNJ5</i>  | NM_000890.3    | Potassium inwardly-rectifying channel, subfamily J, member 5  |
| <i>KIT</i>    | NM_000222.2    | V-kit Hardy-Zuckerman 4 feline sarcoma viral oncogene homolog |
| <i>LIG1</i>   | NM_000234.2    | Ligase I, DNA, ATP-dependent                                  |
| <i>LIG3</i>   | NM_013975.3    | Ligase III, DNA, ATP-dependent                                |
| <i>LIG4</i>   | NM_002312.3    | Ligase IV, DNA, ATP-dependent                                 |
| <i>LMO1</i>   | NM_002315.2    | LIM domain only 1                                             |
| <i>LRIG1</i>  | NM_015541.2    | Leucine-rich repeats and immunoglobulin-like domains 1        |
| <i>MAX</i>    | NM_002382.4    | MYC associated factor X                                       |
| <i>MCPH1</i>  | NM_024596.4    | Microcephalin 1                                               |
| <i>MDC1</i>   | NM_014641.2    | Mediator of DNA-damage checkpoint 1                           |
| <i>MDM2</i>   | NM_002392.5    | Mdm2, p53 E3 ubiquitin protein ligase homolog                 |
| <i>MDM4</i>   | NM_002393.4    | Mdm4 p53 binding protein homolog                              |
| <i>MEN1</i>   | NM_000244.3    | Multiple endocrine neoplasia I                                |
| <i>MET</i>    | NM_001127500.2 | Met proto-oncogene (hepatocyte growth factor receptor)        |
| <i>MGMT</i>   | NM_002412.4    | O-6-methylguanine-DNA methyltransferase                       |
| <i>MLH3</i>   | NM_001040108.1 | mutL homolog 3                                                |
| <i>MMP8</i>   | NM_002424.2    | Matrix metalloproteinase 8 (neutrophil collagenase)           |
| <i>MPL</i>    | NM_005373.2    | Myeloproliferative leukemia virus oncogene                    |

|                |                |                                                                                    |
|----------------|----------------|------------------------------------------------------------------------------------|
| <i>MRE11</i>   | NM_005591.3    | MRE11 meiotic recombination 11 homolog A                                           |
| <i>MSH3</i>    | NM_002439.4    | mutS homolog 3                                                                     |
| <i>MSH5</i>    | NM_002441.4    | mutS homolog 5                                                                     |
| <i>MSR1</i>    | NM_138715.2    | Macrophage scavenger receptor 1                                                    |
| <i>MUS81</i>   | NM_025128.4    | MUS81 endonuclease homolog                                                         |
| <i>MUTYH</i>   | NM_001128425.1 | mutY homolog                                                                       |
| <i>NAT1</i>    | NM_000662.7    | N-acetyltransferase 1 (arylamine N-acetyltransferase)                              |
| <i>NBN</i>     | NM_002485.4    | Nibrin                                                                             |
| <i>NCAM1</i>   | NM_001242607.1 | Neural cell adhesion molecule 1                                                    |
| <i>NELFB</i>   | NM_015456.4    | Cofactor of BRCA1                                                                  |
| <i>NF2</i>     | NM_000268.3    | Neurofibromin 2 (merlin)                                                           |
| <i>NFKBIZ</i>  | NM_031419.3    | Nuclear factor of kappa light polypeptide gene enhancer in B-cells inhibitor, zeta |
| <i>NHEJ1</i>   | NM_024782.2    | Nonhomologous end-joining factor 1                                                 |
| <i>NSD1</i>    | NM_022455.4    | Nuclear receptor binding SET domain protein 1                                      |
| <i>OGG1</i>    | NM_002542.5    | 8-oxoguanine DNA glycosylase                                                       |
| <i>PARP1</i>   | NM_001618.3    | Poly (ADP-ribose) polymerase 1                                                     |
| <i>PCNA</i>    | NM_002592.2    | Proliferating cell nuclear antigen                                                 |
| <i>PHB</i>     | NM_002634.3    | Prohibitin                                                                         |
| <i>PHOX2B</i>  | NM_003924.3    | Paired-like homeobox 2b                                                            |
| <i>PIK3CG</i>  | NM_002649.3    | Phosphatidylinositol-4,5-bisphosphate 3-kinase, catalytic subunit gamma            |
| <i>PLA2G2A</i> | NM_000300.3    | Phospholipase A2, group IIA                                                        |
| <i>PMS1</i>    | NM_000534.4    | PMS1 postmeiotic segregation increased 1                                           |
| <i>POLB</i>    | NM_002690.2    | Polymerase (DNA directed), beta                                                    |
| <i>POLD1</i>   | NM_002691.3    | Polymerase (DNA directed), delta 1, catalytic subunit                              |

|                 |                |                                                                          |
|-----------------|----------------|--------------------------------------------------------------------------|
| <i>POLE</i>     | NM_006231.3    | Polymerase (DNA directed), epsilon, catalytic subunit                    |
| <i>PPM1D</i>    | NM_003620.3    | Protein phosphatase, Mg <sup>2+</sup> /Mn <sup>2+</sup> dependent, 1D    |
| <i>PREX2</i>    | NM_024870.3    | Phosphatidylinositol-3,4,5-trisphosphate-dependent Rac exchange factor 2 |
| <i>PRF1</i>     | NM_001083116.1 | Perforin 1 (pore forming protein)                                        |
| <i>PRKARIA</i>  | NM_212471.2    | Protein kinase, cAMP-dependent, regulatory, type I, alpha                |
| <i>PRKDC</i>    | NM_006904.6    | Protein kinase, DNA-activated, catalytic polypeptide                     |
| <i>PTCH1</i>    | NM_000264.3    | Patched 1                                                                |
| <i>PTTG2</i>    | NM_006607.2    | Pituitary tumor-transforming 2                                           |
| <i>RAD1</i>     | NM_002853.3    | RAD1 homolog                                                             |
| <i>RAD17</i>    | NM_133338.2    | RAD17 homolog                                                            |
| <i>RAD18</i>    | NM_020165.3    | RAD18 homolog                                                            |
| <i>RAD23B</i>   | NM_002874.4    | RAD23 homolog B                                                          |
| <i>RAD50</i>    | NM_005732.3    | RAD50 homolog                                                            |
| <i>RAD51</i>    | NM_133487.3    | RAD51 homolog                                                            |
| <i>RAD51API</i> | NM_001130862.1 | RAD51 associated protein 1                                               |
| <i>RAD51B</i>   | NM_133509.3    | RAD51 homolog B                                                          |
| <i>RAD52</i>    | NM_134424.3    | RAD52 homolog                                                            |
| <i>RAD54B</i>   | NM_012415.3    | RAD54 homolog B                                                          |
| <i>RAD54L</i>   | NM_003579.3    | RAD54-like                                                               |
| <i>RAD9A</i>    | NM_004584.2    | RAD9 homolog A                                                           |
| <i>RBI</i>      | NM_000321.2    | Retinoblastoma 1                                                         |
| <i>RBBP8</i>    | NM_002894.2    | Retinoblastoma binding protein 8                                         |
| <i>RECQL</i>    | NM_002907.3    | RecQ protein-like (DNA helicase Q1-like)                                 |
| <i>RECQL4</i>   | NM_004260.3    | RecQ protein-like 4                                                      |
| <i>RECQL5</i>   | NM_004259.6    | RecQ protein-like 5                                                      |
| <i>RET</i>      | NM_020975.4    | Ret proto-oncogene                                                       |

|               |                |                                                                    |
|---------------|----------------|--------------------------------------------------------------------|
| <i>RFC1</i>   | NM_002913.4    | Replication factor C (activator 1) 1, 145kDa                       |
| <i>RFC2</i>   | NM_181471.2    | Replication factor C (activator 1) 2, 40kDa                        |
| <i>RFC4</i>   | NM_181573.2    | Replication factor C (activator 1) 4, 37kDa                        |
| <i>RHBDF2</i> | NM_024599.5    | Rhomboid 5 homolog 2                                               |
| <i>RNF146</i> | NM_001242844.1 | Ring finger protein 146                                            |
| <i>RNF168</i> | NM_152617.3    | Ring finger protein 168, E3 ubiquitin protein ligase               |
| <i>RNF8</i>   | NM_003958.3    | Ring finger protein 8, E3 ubiquitin protein ligase                 |
| <i>RPA1</i>   | NM_002945.3    | Replication protein A1, 70kDa                                      |
| <i>RUNX1</i>  | NM_001754.4    | Runt-related transcription factor 1                                |
| <i>SBDS</i>   | NM_016038.2    | SBDS ribosome maturation factor                                    |
| <i>SDHA</i>   | NM_004168.3    | Succinate dehydrogenase complex flavoprotein subunit A             |
| <i>SDHAF2</i> | NM_017841.2    | Succinate dehydrogenase complex assembly factor 2                  |
| <i>SDHB</i>   | NM_003000.2    | Succinate dehydrogenase complex, subunit B, iron sulfur (Ip)       |
| <i>SDHC</i>   | NM_003001.3    | Succinate dehydrogenase complex subunit C                          |
| <i>SDHD</i>   | NM_003002.3    | Succinate dehydrogenase complex subunit D                          |
| <i>SETBP1</i> | NM_002894.2    | SET binding protein 1                                              |
| <i>SETX</i>   | NM_015046.5    | Senataxin                                                          |
| <i>SHPRH</i>  | NM_001042683.2 | SNF2 histone linker PHD RING helicase, E3 ubiquitin protein ligase |
| <i>SLX4</i>   | NM_032444.2    | SLX4 structure-specific endonuclease subunit homolog               |
| <i>SMAD4</i>  | NM_005359.5    | SMAD family member 4                                               |

|                |                |                                                                                                   |
|----------------|----------------|---------------------------------------------------------------------------------------------------|
| <i>SMARCA4</i> | NM_001128849.1 | SWI/SNF related, matrix associated, actin dependent regulator of chromatin, subfamily a, member 4 |
| <i>SMARCB1</i> | NM_003073.4    | SWI/SNF related, matrix associated, actin dependent regulator of chromatin, subfamily b, member 1 |
| <i>SMARCE1</i> | NM_003079.4    | SWI/SNF related, matrix associated, actin dependent regulator of chromatin, subfamily e, member 1 |
| <i>SUFU</i>    | NM_016169.3    | Suppressor of fused homolog                                                                       |
| <i>TCL1A</i>   | NM_021966.2    | T-cell leukemia/lymphoma 1A                                                                       |
| <i>TELO2</i>   | NM_016111.3    | TEL2, telomere maintenance 2, homolog                                                             |
| <i>TERF2</i>   | NM_005652.4    | Telomeric repeat binding factor 2                                                                 |
| <i>TERT</i>    | NM_198253.2    | Telomerase reverse transcriptase                                                                  |
| <i>TLR2</i>    | NM_003264.4    | Toll-like receptor 2                                                                              |
| <i>TLR4</i>    | NM_138554.4    | Toll-like receptor 4                                                                              |
| <i>TMEM127</i> | NM_017849.3    | Transmembrane protein 127                                                                         |
| <i>TOPBP1</i>  | NM_007027.3    | Topoisomerase (DNA) II binding protein 1                                                          |
| <i>TP53BP1</i> | NM_133487.3    | Tumor protein p53 binding protein 1                                                               |
| <i>TSC1</i>    | NM_000368.4    | Tuberous sclerosis 1                                                                              |
| <i>TSC2</i>    | NM_000548.4    | Tuberous sclerosis 2                                                                              |
| <i>TSHR</i>    | NM_000369.2    | Thyroid stimulating hormone receptor                                                              |
| <i>UBE2A</i>   | NM_003336.3    | Ubiquitin-conjugating enzyme E2A                                                                  |
| <i>UBE2B</i>   | NM_003337.3    | Ubiquitin-conjugating enzyme E2B                                                                  |
| <i>UBE2I</i>   | NM_003345      | Ubiquitin-conjugating enzyme E2I                                                                  |
| <i>UBE2V2</i>  | NM_003350.2    | Ubiquitin-conjugating enzyme E2 variant 2                                                         |
| <i>UBE4B</i>   | NM_001105562.2 | Ubiquitination factor E4B                                                                         |
| <i>UIMC1</i>   | NM_001199297.2 | Ubiquitin interaction motif containing 1                                                          |

|               |             |                                                                        |
|---------------|-------------|------------------------------------------------------------------------|
| <i>VHL</i>    | NM_000551.3 | Von Hippel-Lindau tumor suppressor, E3 ubiquitin protein ligase        |
| <i>WRN</i>    | NM_000553.4 | Werner syndrome, RecQ helicase-like                                    |
| <i>WT1</i>    | NM_024426.4 | Wilms tumor 1                                                          |
| <i>XPA</i>    | NM_000380.3 | Xeroderma pigmentosum, complementation group A                         |
| <i>XPC</i>    | NM_004628.4 | Xeroderma pigmentosum, complementation group C                         |
| <i>XRCC1</i>  | NM_006297.2 | X-ray repair complementing defective repair in Chinese hamster cells 1 |
| <i>XRCC2</i>  | NM_005431.1 | X-ray repair complementing defective repair in Chinese hamster cells 2 |
| <i>XRCC3</i>  | NM_005432.3 | X-ray repair complementing defective repair in Chinese hamster cells 3 |
| <i>XRCC4</i>  | NM_022406.3 | X-ray repair complementing defective repair in Chinese hamster cells 4 |
| <i>XRCC5</i>  | NM_021141.3 | X-ray repair complementing defective repair in Chinese hamster cells 5 |
| <i>XRCC6</i>  | NM_001469.4 | X-ray repair complementing defective repair in Chinese hamster cells 6 |
| <i>ZNF350</i> | NM_021632.3 | Zinc finger protein 350                                                |
| <i>ZNF365</i> | NM_014951.2 | Zinc finger protein 365                                                |

<sup>a</sup>Only deletions causing inactivation of *MSH2* were considered. EC, endometrial cancer; N, number.

Table SIII. List of all carriers of pathogenic variant in EC-predisposition genes, including their clinical information.

| Gene groups | Gene        | Variant                         | Age at EC diagnosis, years | Histology    | Fulfilled LS criteria | Fulfilled HBOC criteria | ClinVar ID   |
|-------------|-------------|---------------------------------|----------------------------|--------------|-----------------------|-------------------------|--------------|
| LS          | <i>MLH1</i> | c.350C>T, p.(Thr117Met)         | 46                         | Endometrioid | Yes                   | Yes                     | 17094        |
| LS          | <i>MLH1</i> | c.677G>A, p.(Arg226Gln)         | 60                         | Endometrioid | Yes                   | No                      | 90318        |
| LS          | <i>MLH1</i> | c.790+1G>A, p.(?)               | 58                         | Endometrioid | No                    | No                      | 90356        |
| LS          | <i>MLH1</i> | c.1489dup, p.(Arg497ProfsTer6)  | 55                         | Endometrioid | Yes                   | No                      | 89753        |
| LS          | <i>MLH1</i> | Deletion of exons 1-13          | 50                         | Endometrioid | Yes                   | No                      | <sup>a</sup> |
| LS          | <i>MSH2</i> | c.1500dup, p.(Arg501GlnfsTer12) | 46                         | Endometrioid | Yes                   | Yes                     | 90683        |
| LS          | <i>MSH2</i> | c.1720del, p.(Gln574ArgfsTer16) | 45                         | Unknown      | Yes                   | No                      | 90761        |
| LS          | <i>MSH2</i> | c.2459-2_2472del, p.(Gly820fs)  | 51                         | Unknown      | Yes                   | Yes                     | 2430176      |
| LS          | <i>MSH2</i> | Deletion of exons 1-8           | 29                         | Endometrioid | Yes                   | No                      | <sup>a</sup> |
| LS          | <i>MSH2</i> | Deletion of exons 1-16          | 32                         | Endometrioid | Yes                   | No                      | <sup>a</sup> |
| LS          | <i>MSH2</i> | Deletion of exons 3             | 42                         | Endometrioid | Yes                   | No                      | <sup>a</sup> |
| LS          | <i>MSH2</i> | Deletion of exons 5-6           | 54                         | Unknown      | Yes                   | No                      | <sup>a</sup> |
| LS          | <i>MSH6</i> | c.643del, p.(Val215Ter)         | 67                         | Endometrioid | No                    | No                      | 479909       |
| LS          | <i>MSH6</i> | c.741dup, p.(Arg248ThrfsTer8)   | 55                         | Unknown      | Yes                   | No                      | 410494       |
| LS          | <i>MSH6</i> | c.885dup, p.(Val296SerfsTer16)  | 73                         | Endometrioid | Yes                   | No                      | 641585       |

|         |                    |                                                                  |    |                         |     |     |               |
|---------|--------------------|------------------------------------------------------------------|----|-------------------------|-----|-----|---------------|
| LS      | <i>MSH6</i>        | c.964_967del, p.(Ala322ProfsTer15)                               | 62 | Endometrioid/clear cell | No  | No  | 2430174       |
| LS      | <i>MSH6</i>        | c.1444C>T, p.(Arg482Ter)                                         | 65 | Endometrioid            | No  | No  | 89194         |
| LS      | <i>MSH6</i>        | c.1754T>C, p.(Leu585Pro)                                         | 53 | Endometrioid/serous     | No  | No  | 89220         |
| LS      | <i>MSH6</i>        | c.1754T>C, p.(Leu585Pro)                                         | 43 | Endometrioid            | Yes | No  | 89220         |
| LS      | <i>MSH6</i>        | c.2348_2349del, p.(Cys783Ter)                                    | 45 | Endometrioid/clear cell | Yes | No  | 89274         |
| LS      | <i>MSH6</i>        | c.2677_2678del, p.(Leu893AlafsTer6)                              | 42 | Endometrioid            | Yes | No  | 821660        |
| LS      | <i>MSH6</i>        | c.2759del, p.(Lys920ArgfsTer25)                                  | 51 | Unknown                 | Yes | No  | 428433        |
| LS      | <i>MSH6</i>        | c.3261del, p.(Phe1088SerfsTer2)                                  | 62 | Endometrioid            | Yes | No  | 89363         |
| LS      | <i>MSH6</i>        | c.3261dup, p.(Phe1088LeufsTer5)                                  | 49 | Endometrioid            | Yes | Yes | 89364         |
| LS      | <i>MSH6</i>        | c.3995T>G, p.(Leu1332Ter)                                        | 60 | Endometrioid            | Yes | No  | 2430173       |
| LS/HBOC | <i>MLH1/BRC A1</i> | c.1483dup, p.(His495ProfsTer29)/c.5266dup, p.(Gln1756ProfsTer74) | 48 | Endometrioid            | Yes | Yes | 2430175/17677 |
| LS/HBOC | <i>MSH2/ATM</i>    | c.1676del, p.(Leu559Ter)/c.8147T>C p.(Val2716Ala)                | 53 | Unknown                 | Yes | No  | 90743/142700  |
| HBOC    | <i>ATM</i>         | c.601C>T, p.(Gln201Ter)                                          | 78 | Endometrioid            | No  | No  | 265611        |
| HBOC    | <i>ATM</i>         | c.2921+1G>A, p.(?)                                               | 55 | Endometrioid            | No  | No  | 141182        |
| HBOC    | <i>ATM</i>         | c.3250C>T, p.(Gln1084Ter)                                        | 63 | papillary serous        | Yes | Yes | 665551        |
| HBOC    | <i>ATM</i>         | Deletion of exons 35-44                                          | 70 | Unknown                 | No  | No  | <sup>a</sup>  |

|      |              |                                      |      |                  |     |     |              |
|------|--------------|--------------------------------------|------|------------------|-----|-----|--------------|
| HBOC | <i>BARD1</i> | c.1690C>T, p.(Gln564Ter)             | 28   | Endometrioid     | Yes | Yes | 127720       |
| HBOC | <i>BRCA1</i> | c.68_69del, p.(Glu23ValfsTer17)      | N.A. | Endometrioid     | Yes | No  | 17662        |
| HBOC | <i>BRCA1</i> | c.1687C>T, p.(Gln563Ter)             | 80   | EIN              | No  | No  | 37426        |
| HBOC | <i>BRCA1</i> | c.2411_2412del, p.(Gln804LeufsTer5)  | 53   | EIN              | Yes | Yes | 37466        |
| HBOC | <i>BRCA1</i> | c.5095C>T, p.(Arg1699Trp)            | 69   | Endometrioid     | Yes | Yes | 55396        |
| HBOC | <i>BRCA1</i> | c.5510G>A, p.(Trp1837Ter)            | N.A. | Unknown          | Yes | No  | 55608        |
| HBOC | <i>BRCA1</i> | c.5266dup, p.(Gln1756ProfsTer74)     | 61   | Unknown          | Yes | Yes | 17677        |
| HBOC | <i>BRCA1</i> | c.5266dup, p.(Gln1756ProfsTer74)     | 68   | Leiomyosarcoma   | No  | Yes | 17677        |
| HBOC | <i>BRCA1</i> | c.5266dup, p.(Gln1756ProfsTer74)     | N.A. | Unknown          | Yes | Yes | 17677        |
| HBOC | <i>BRCA1</i> | c.5266dup, p.(Gln1756ProfsTer74)     | 41   | Papillary serous | Yes | Yes | 17677        |
| HBOC | <i>BRCA1</i> | Deletion of exons 1-17               | 57   | Endometrioid     | No  | Yes | <sup>a</sup> |
| HBOC | <i>BRCA2</i> | c.658_659del, p.(Val220IlefsTer4)    | N.A. | Unknown          | No  | No  | 9342         |
| HBOC | <i>BRCA2</i> | c.2808_2811del, p.(Ala938ProfsTer21) | 41   | Unknown          | Yes | No  | 9322         |
| HBOC | <i>BRCA2</i> | c.5213_5216del, p.(Thr1738IlefsTer2) | 50   | Endometrioid     | No  | No  | 37951        |
| HBOC | <i>BRCA2</i> | c.5946del, p.(Ser1982ArgfsTer22)     | 55   | Endometrioid     | No  | No  | 9325         |
| HBOC | <i>BRCA2</i> | c.6275_6276del, p.(Leu2092ProfsTer7) | 57   | Endometrioid     | No  | Yes | 9318         |
| HBOC | <i>BRCA2</i> | c.6591_6592del, p.(Glu2198AsnfsTer4) | 62   | Unknown          | No  | No  | 9319         |
| HBOC | <i>BRCA2</i> | c.7878G>C, p.(Trp2626Cys)            | 63   | Leiomyosarcoma   | No  | No  | 38125        |
| HBOC | <i>BRIP1</i> | c.2038_2039dup, p.(Leu680PhefsTer9)  | 71   | Leiomyosarcoma   | No  | No  | 128166       |
| HBOC | <i>CHEK2</i> | c.444+1G>A, p.(Gln149IlefsTer6)      | 62   | Endometrioid     | No  | No  | 128075       |
| HBOC | <i>CHEK2</i> | c.444+1G>A, p.Gln149IlefsTer6        | 37   | Unknown          | Yes | Yes | 128075       |

|      |               |                                      |    |                |     |     |        |
|------|---------------|--------------------------------------|----|----------------|-----|-----|--------|
| HBOC | <i>CHEK2</i>  | c.846+4_846+7del, p.Asp265_His282del | 64 | Endometrioid   | No  | No  | 216652 |
| HBOC | <i>CHEK2</i>  | c.846+4_846+7del, p.Asp265_His282del | 65 | Unknown        | Yes | No  | 216652 |
| HBOC | <i>CHEK2</i>  | c.846+4_846+7del, p.Asp265_His282del | 44 | Endometrioid   | Yes | No  | 216652 |
| HBOC | <i>CHEK2</i>  | c.894T>G, p.(Tyr298Ter)              | 61 | Unknown        | Yes | No  | 232048 |
| HBOC | <i>PALB2</i>  | c.761C>G, p.(Ser254Ter)              | 53 | Leiomyosarcoma | Yes | No  | 632930 |
| HBOC | <i>PTEN</i>   | c.170T>G, p.(Leu57Trp)               | 57 | Unknown        | Yes | No  | 185713 |
| HBOC | <i>RAD51C</i> | c.502A>T, p.(Arg168Ter)              | 62 | Endometrioid   | Yes | Yes | 141095 |
| HBOC | <i>RAD51C</i> | c.1026+5_1026+7del                   | 34 | Unknown        | Yes | Yes | 128201 |

<sup>a</sup>Copy number variations were not submitted to ClinVar because the exact nucleotide coordinates of the breakpoints required for the ClinVar submission were not determined. EC, endometrial cancer; EIN, endometrial intraepithelial neoplasia; HBOC, hereditary breast and ovarian cancer; LS, Lynch syndrome; N.A., not available.

Table SIV. Frequencies of germline PV in 207 candidate genes.

| Germline PV          | Indication for germline genetic testing |                      |                         |                              | All EC-predisposition gene-negative patients, n (%) (N=467) | EC-predisposition gene-negative PMC, n (%) (N=1616) | All patients with EC vs. PMC |         |
|----------------------|-----------------------------------------|----------------------|-------------------------|------------------------------|-------------------------------------------------------------|-----------------------------------------------------|------------------------------|---------|
|                      | LS, n (%) (N=126)                       | HBOC, n (%) (N=13)   | LS + HBOC, n (%) (N=67) | Non-indicated, n (%) (N=261) |                                                             |                                                     | OR (95% CI)                  | P-value |
| ATRIP <sup>a</sup>   | 0                                       | 0                    | 1 <sup>a</sup> (1.5)    | 1 (0.4)                      | 2 <sup>a</sup> (0.4)                                        | 3 (0.2)                                             | 2.3 (0.4-13.9)               | 0.3     |
| CASP8                | 0                                       | 0                    | 1 (1.5)                 | 0                            | 1 (0.2)                                                     | 1 (0.1)                                             | 3.2 (0.2-50.5)               | 0.4     |
| CWF19L2              | 0                                       | 0                    | 0                       | 0                            | 0                                                           | 2 (0.1)                                             | N.A.                         |         |
| DMBT1 <sup>b,c</sup> | 0                                       | 1 <sup>b</sup> (7.7) | 1 <sup>c</sup> (1.5)    | 1 (0.4)                      | 3 <sup>b,c</sup> (0.6)                                      | 1 (0.1)                                             | 9.5 (1-91.5)                 | 0.1     |
| EMSY                 | 0                                       | 0                    | 0                       | 1 (0.4)                      | 1 (0.2)                                                     | 0                                                   | N.A.                         |         |
| EPHX1                | 1 (0.8)                                 | 0                    | 0                       | 0                            | 1 (0.2)                                                     | 2 (0.1)                                             | 1.6 (0.1-17.4)               | 0.7     |
| ERCC3 <sup>d,e</sup> | 0                                       | 0                    | 1 <sup>d</sup> (1.5)    | 1 <sup>e</sup> (0.4)         | 2 <sup>d,e</sup> (0.4)                                      | 7 (0.4)                                             | 1 (0.2-4.7)                  | >0.9    |
| ERCC4 <sup>f</sup>   | 0                                       | 0                    | 1 <sup>f</sup> (1.5)    | 0                            | 1 <sup>f</sup> (0.2)                                        | 2 (0.1)                                             | 1.6 (0.1-17.4)               | 0.7     |
| ERCC5                | 0                                       | 0                    | 0                       | 1 (0.4)                      | 1 (0.2)                                                     | 0                                                   | N.A.                         |         |
| ERCC6 <sup>e</sup>   | 0                                       | 0                    | 1 (1.5)                 | 2 <sup>e</sup> (0.8)         | 3 <sup>e</sup> (0.6)                                        | 0                                                   | N.A.                         |         |
| EXO1                 | 2 (1.6)                                 | 0                    | 1 (1.5)                 | 0                            | 3 (0.6)                                                     | 2 (0.1)                                             | 4.8 (0.8-28.5)               | 0.1     |
| FAN1                 | 1 (0.8)                                 | 0                    | 0                       | 1 (0.4)                      | 2 (0.4)                                                     | 3 (0.2)                                             | 2.3 (0.4-13.9)               | 0.3     |
| FANCA                | 2 (1.6)                                 | 0                    | 0                       | 2 (0.8)                      | 4 (0.9)                                                     | 10 (0.6)                                            | 1.3 (0.4-4)                  | 0.7     |
| FANCD2               | 1 (0.8)                                 | 0                    | 0                       | 0                            | 1 (0.2)                                                     | 0                                                   | N.A.                         |         |
| FANCE                | 1 (0.8)                                 | 0                    | 0                       | 0                            | 1 (0.2)                                                     | 1 (0.1)                                             | 3.2 (0.2-50.5)               | 0.4     |
| FANCG                | 0                                       | 0                    | 0                       | 1 (0.4)                      | 1 (0.2)                                                     | 1 (0.1)                                             | 3.2 (0.2-50.5)               | 0.4     |

|                      |                      |                      |                      |         |                        |          |                |      |
|----------------------|----------------------|----------------------|----------------------|---------|------------------------|----------|----------------|------|
| FANCI                | 1 (0.8)              | 0                    | 0                    | 0       | 1 (0.2)                | 7 (0.4)  | 0.5 (0.1-3.7)  | 0.7  |
| FANCL <sup>g</sup>   | 0                    | 0                    | 1 <sup>g</sup> (1.5) | 0       | 1 <sup>g</sup> (0.2)   | 0        | N.A.           |      |
| FANCM                | 1 (0.8)              | 0                    | 0                    | 1 (0.4) | 2 (0.4)                | 3 (0.2)  | 2.3 (0.4-13.9) | 0.3  |
| KCNJ5                | 0                    | 0                    | 0                    | 1 (0.4) | 1 (0.2)                | 1 (0.1)  | 3.2 (0.2-50.5) | 0.4  |
| LIG3                 | 0                    | 0                    | 1 (1.5)              | 1 (0.4) | 2 (0.4)                | 4 (0.2)  | 1.6 (0.3-8.6)  | 0.6  |
| LRIG1                | 0                    | 0                    | 0                    | 1 (0.4) | 1 (0.2)                | 0        | N.A.           |      |
| MCPH1                | 0                    | 0                    | 0                    | 2 (0.8) | 2 (0.4)                | 7 (0.4)  | 1 (0.2-4.7)    | >0.9 |
| MEN1                 | 1 (0.8)              | 0                    | 0                    | 0       | 1 (0.2)                | 0        | N.A.           |      |
| MLH3                 | 0                    | 0                    | 0                    | 1 (0.4) | 1 (0.2)                | 1 (0.1)  | 3.2 (0.2-50.5) | 0.4  |
| MRE11A               | 0                    | 0                    | 0                    | 1 (0.4) | 1 (0.2)                | 0        | N.A.           |      |
| MUTYH <sup>d</sup>   | 0                    | 0                    | 2 <sup>d</sup> (3)   | 3 (1.1) | 5 <sup>d</sup> (1.1)   | 18 (1.1) | 0.9 (0.3-2.4)  | 0.8  |
| NBN <sup>h</sup>     | 2 <sup>h</sup> (1.6) | 0                    | 0                    | 0       | 2 <sup>h</sup> (0.4)   | 7 (0.4)  | 1.0 (0.2-4.7)  | >0.9 |
| PIK3CG               | 0                    | 0                    | 0                    | 0       | 0                      | 0        | N.A.           |      |
| POLD1 <sup>g</sup>   | 0                    | 0                    | 1 <sup>g</sup> (1.5) | 0       | 1 <sup>g</sup> (0.2)   | 0        | N.A.           |      |
| POLE                 | 0                    | 0                    | 1 (1.5)              | 1 (0.4) | 2 (0.4)                | 1 (0.1)  | 6.3 (0.6-69.8) | 0.1  |
| PREX2                | 0                    | 0                    | 0                    | 0       | 0                      | 1 (0.1)  | N.A.           |      |
| PRF1 <sup>a</sup>    | 0                    | 0                    | 1 <sup>a</sup> (1.5) | 0       | 1 <sup>a</sup> (0.2)   | 1 (0.1)  | 3.2 (0.2-50.5) | 0.4  |
| RAD1                 | 0                    | 0                    | 1 (1.5)              | 0       | 1 (0.2)                | 0        | N.A.           |      |
| RAD17 <sup>b,c</sup> | 0                    | 1 <sup>b</sup> (7.7) | 1 <sup>c</sup> (1.5) | 0       | 2 <sup>b,c</sup> (0.4) | 2 (0.1)  | 3.2 (0.4-22.5) | 0.2  |
| RAD50                | 0                    | 0                    | 0                    | 0       | 0                      | 8 (0.5)  | N.A.           |      |
| RAD51B               | 0                    | 0                    | 0                    | 1 (0.4) | 1 (0.2)                | 0        | N.A.           |      |

|                     |                        |                       |                                   |                        |                          |           |                |      |
|---------------------|------------------------|-----------------------|-----------------------------------|------------------------|--------------------------|-----------|----------------|------|
| RAD54L <sup>f</sup> | 0                      | 0                     | 1 <sup>f</sup> (1.5)              | 0                      | 1 <sup>f</sup> (0.2)     | 1 (0.1)   | 3.2 (0.2-50.5) | 0.4  |
| RBBP8               | 0                      | 0                     | 0                                 | 1 (0.4)                | 1 (0.2)                  | 0         | N.A.           |      |
| RCF4 <sup>h</sup>   | 1 <sup>h</sup> (0.8)   | 0                     | 0                                 | 0                      | 1 <sup>h</sup> (0.2)     | 2 (0.1)   | 1.6 (0.1-17.4) | 0.7  |
| RECQL               | 0                      | 1 (7.7)               | 0                                 | 0                      | 1 (0.2)                  | 1 (0.1)   | 3.2 (0.2-50.5) | 0.4  |
| RECQL4              | 0                      | 0                     | 1 (1.5)                           | 0                      | 1 (0.2)                  | 8 (0.5)   | 1.1 (0.2-5.2)  | >0.9 |
| RECQL5              | 0                      | 0                     | 0                                 | 0                      | 0                        | 6 (0.4)   | N.A.           |      |
| RNF168              | 1 (0.8)                | 0                     | 0                                 | 0                      | 1 (0.2)                  | 1 (0.1)   | 3.2 (0.2-50.5) | 0.4  |
| SBDS                | 0                      | 0                     | 0                                 | 1 (0.4)                | 1 (0.2)                  | 21 (1.3)  | 0.3 (0.1-1.3)  | 0.1  |
| SETX                | 0                      | 0                     | 0                                 | 1 (0.4)                | 1 (0.2)                  | 1 (0.1)   | 3.2 (0.2-50.5) | 0.4  |
| SLX4                | 0                      | 0                     | 0                                 | 1 (0.4)                | 1 (0.2)                  | 1 (0.1)   | 3.2 (0.2-50.5) | 0.4  |
| XRCC4               | 0                      | 0                     | 1 (1.5)                           | 1 (0.4)                | 2 (0.4)                  | 1 (0.1)   | 6.3 (0.6-69.8) | 0.1  |
| All PV              | 15                     | 3                     | 19                                | 29                     | 66                       | 139       |                |      |
| All carriers        | 14 <sup>h</sup> (11.1) | 2 <sup>b</sup> (15.4) | 14 <sup>a,c,d,f,g</sup><br>(20.9) | 28 <sup>e</sup> (10.7) | 58 <sup>a-h</sup> (12.4) | 139 (8.6) |                |      |

Pathogenic variants in two candidate cancer susceptibility genes: <sup>a</sup>ATRIP/PRF1, <sup>b</sup>DMBT1/RAD17, <sup>c</sup>DMBT1/RAD17, <sup>d</sup>ERCC3/MUTYH, <sup>e</sup>ERCC3/ERCC6, <sup>f</sup>ERCC4/RAD54L, <sup>g</sup>FANCL/POLD1, <sup>h</sup>NBN/RCF4. Frequencies of germline PV found in a subgroup of patients fulfilling criteria for germline genetic testing for LS, HBOC, LS and HBOC, individuals not fulfilling any criteria (non-indicated), an aggregated group of all patients with EC, and a group of PMC. CI, confidence interval; EC, endometrial cancer; HBOC, hereditary breast and ovarian cancer; LS, Lynch syndrome; N, number; N.A., not available; OR, odds ratio; PMC, population-matched controls; PV, pathogenic variant.
